# Supplementary material
Source: Springer Nature journal article supplement (https://www.springermedizin.de/resource/supplementary/12943_2010_700_MOESM2_ESM.pdf/9554612)
Supplement: MOESM2 [file 9554612]

NB-hypo cluster 1 (21)

NB-hypo cluster 2 (67)

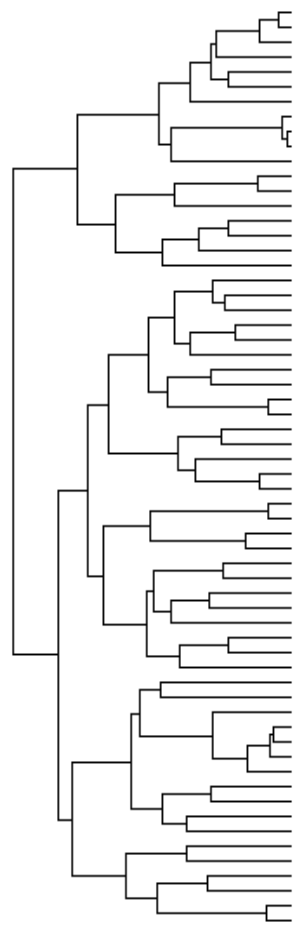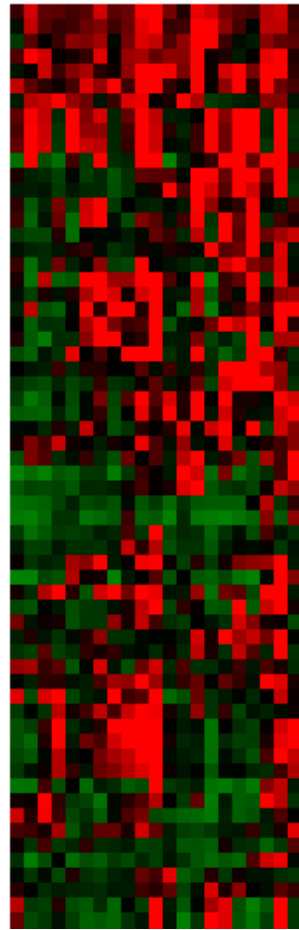

ITCC01380  
ITCC0288  
ITCC0392  
ITCC0415  
ITCC0417  
ITCC0198  
ITCC0169  
ITCC0383  
ITCC0387  
ITCC0390  
ITCC0021  
ITCC0107  
ITCC0132  
ITCC0155  
ITCC0101  
ITCC0027  
ITCC0030  
ITCC0024  
ITCC0024  
ITCC0194

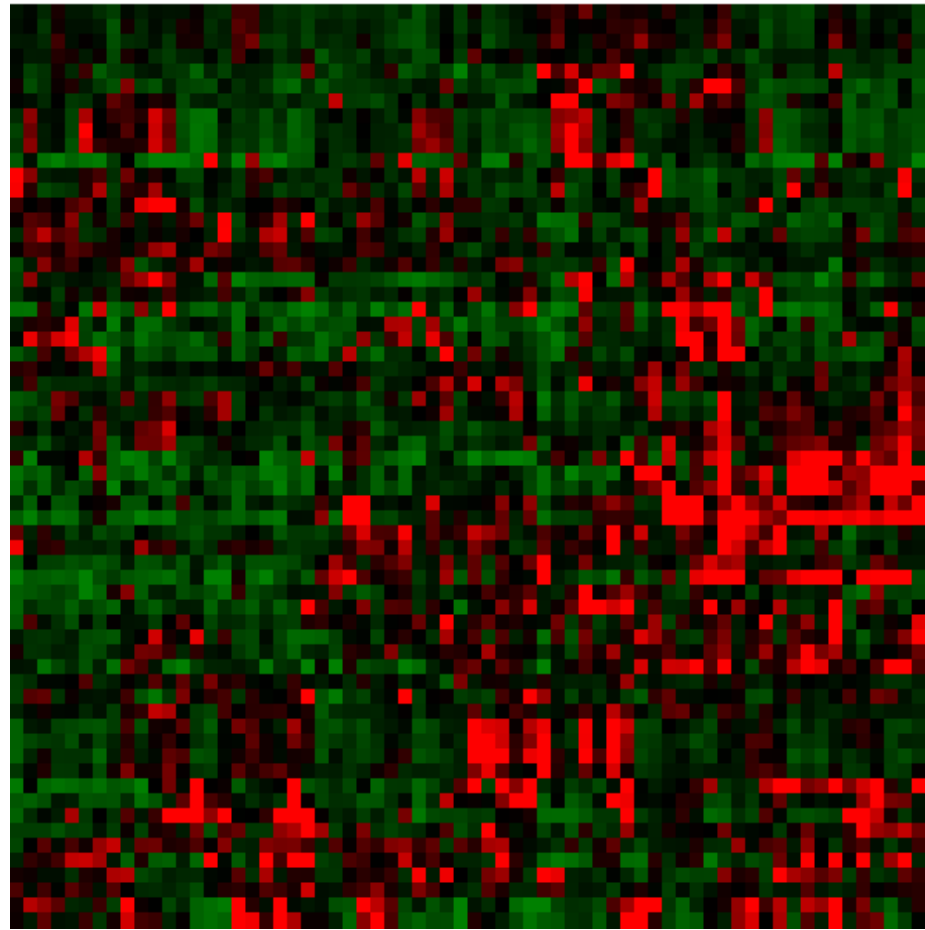

ITCC0103  
ITCC0191  
ITCC0175  
ITCC0217  
ITCC0144  
ITCC0045  
ITCC0151  
ITCC0391  
ITCC0035  
ITCC0013  
ITCC0132  
ITCC0150  
ITCC0148  
ITCC0172  
ITCC0302  
ITCC0398  
ITCC0181  
ITCC0147  
ITCC0382  
ITCC0386  
ITCC0032  
ITCC0116  
ITCC0144  
ITCC0183  
ITCC0109  
ITCC0034  
ITCC0049  
ITCC0063  
ITCC0014  
ITCC0020  
ITCC0044  
ITCC0038  
ITCC0018  
ITCC0017  
ITCC0061  
ITCC0065  
ITCC0184  
ITCC0031  
ITCC0130  
ITCC0022  
ITCC0119  
ITCC0061  
ITCC0013  
ITCC0105  
ITCC0008  
ITCC0025  
ITCC0015  
ITCC0059  
ITCC0070  
ITCC0111  
ITCC0009  
ITCC0002  
ITCC0002  
ITCC0026  
ITCC0285  
ITCC0195  
ITCC0010  
ITCC0001  
ITCC0014

200738\_e\_at  
200737\_at  
217356\_e\_at  
200822\_x\_at  
226452\_at  
227337\_at  
223172\_e\_at  
220942\_x\_at  
224345\_x\_at  
223193\_x\_at  
236180\_at  
201849\_at  
201848\_e\_at  
201968\_e\_at  
202733\_at  
200632\_e\_at  
223046\_at  
228499\_at  
221008\_e\_at  
200827\_at  
210095\_e\_at  
202499\_e\_at  
201170\_e\_at  
202887\_e\_at  
226348\_at  
226347\_at  
210512\_e\_at  
212171\_x\_at  
221497\_x\_at  
224314\_e\_at  
211527\_x\_at  
210513\_e\_at  
201008\_e\_at  
201008\_e\_at  
200920\_e\_at  
200921\_e\_at  
228489\_e\_at  
155836S\_at  
209446\_e\_at  
239798\_at  
230630\_at  
204348\_e\_at  
204347\_at  
238551\_at  
212689\_e\_at  
231233\_at  
207196\_e\_at  
221123\_x\_at  
223216\_x\_at  
232693\_e\_at  
218149\_e\_at  
203628\_at  
206401\_e\_at  
203529\_e\_at  
221478\_e\_at  
202022\_at  
202364\_at  
221478\_at  
222847\_e\_at  
219232\_e\_at
